# Supplementary material
Source: Royal Society of Chemistry journal article supplement (doi:10.1039/d6cp01718e)
Supplement: d6cp01718e1.pdf [file d6cp01718e1.pdf]

**Supporting Information:**  
**Accelerating geometry optimization via**  
**Grassmann-DIIS extrapolation**

Zihui Song and Ka Un Lao\*

*Department of Chemistry, Virginia Commonwealth University, Richmond, VA, USA*

E-mail: laoku@vcu.edu

Table S1: Total number of SCF iterations for Phenol(H<sub>2</sub>O)<sub>10</sub> and (H<sub>2</sub>O)<sub>20</sub> at B3LYP/def2-SVP levels using standard geometry optimization (OPT) and G-Ext-DIIS-augmented OPT with the core Hamiltonian matrix **H** and Coulomb matrix **CM**. Results are reported for different combinations of the length of the initial standard optimization phase (*i*) required for data accumulation and the number of historical density matrices (*k*) used in the extrapolation. The corresponding percentage reduction (PR) in SCF iterations, relative to the standard OPT procedure in which the MO coefficients from the preceding step are used as the initial guess for the current SCF calculation, is also reported.

| System                                 | Standard<br>OPT | <i>i</i> | <i>k</i> | G-Ext-DIIS |        |           |        |
|----------------------------------------|-----------------|----------|----------|------------|--------|-----------|--------|
|                                        |                 |          |          | <b>H</b>   | PR (%) | <b>CM</b> | PR (%) |
| Strategy-I                             |                 |          |          |            |        |           |        |
| Phenol(H <sub>2</sub> O) <sub>10</sub> | 2199            | 25       | 25       | 1752       | -20.3% | 2204      | +0.23% |
|                                        |                 | 20       | 20       | 1758       | -20.1% | 2206      | +0.32% |
|                                        |                 | 20       | 15       | 1764       | -19.8% | 2199      | 0.00%  |
|                                        |                 | 20       | 10       | 1834       | -16.6% | 2200      | +0.05  |
|                                        |                 | 20       | 8        | 1847       | -16.0% | 2198      | -0.05% |
|                                        |                 | 20       | 5        | 1921       | -12.6% | 2201      | +0.1%  |
|                                        |                 | 20       | 2        | 2064       | -6.1%  | 2206      | +0.32% |
|                                        |                 | 10       | 10       | 1823       | -17.1% | 2199      | 0.00%  |
|                                        |                 | 10       | 8        | 1832       | -16.7% | 2204      | +0.23% |
|                                        |                 | 10       | 5        | 1913       | -13.0% | 2186      | -0.59% |
| 10                                     | 2               | 2051     | -6.7%    | 2199       | 0.00%  |           |        |
| (H <sub>2</sub> O) <sub>20</sub>       | 2075            | 25       | 25       | 1604       | -22.7% | 2060      | -0.72% |
|                                        |                 | 20       | 20       | 1605       | -22.7% | 2095      | +0.96% |
|                                        |                 | 20       | 15       | 1617       | -22.1% | 2062      | -0.63% |
|                                        |                 | 20       | 10       | 1657       | -20.1% | 2092      | +0.82% |
|                                        |                 | 20       | 8        | 1677       | -19.2% | 2092      | +0.82% |
|                                        |                 | 20       | 5        | 1765       | -14.9% | 2094      | +0.92% |
|                                        |                 | 20       | 2        | 1953       | -5.9%  | 2061      | -0.67% |
|                                        |                 | 10       | 10       | 1669       | -19.6% | 2060      | -0.72% |
|                                        |                 | 10       | 8        | 1679       | -19.1% | 2059      | -0.78% |
|                                        |                 | 10       | 5        | 1765       | -14.9% | 2057      | -0.87% |
| 10                                     | 2               | 1951     | -6.0%    | 2063       | -0.58% |           |        |
| Strategy-II                            |                 |          |          |            |        |           |        |
| Phenol(H <sub>2</sub> O) <sub>10</sub> | 2199            | 25       | all      | 1634       | -25.7% | 2190      | -0.41% |
|                                        |                 | 20       | all      | 1622       | -26.2% | 2194      | -0.23% |
|                                        |                 | 10       | all      | 1615       | -26.6% | 2206      | +0.32% |
|                                        |                 | 8        | all      | 1618       | -26.4% | 2205      | +0.27% |
|                                        |                 | 5        | all      | 1610       | -26.8% | 2203      | +0.18% |
|                                        |                 | 2        | all      | 1601       | -27.2% | 2204      | +0.23% |
| (H <sub>2</sub> O) <sub>20</sub>       | 2075            | 25       | all      | 1478       | -28.8% | 2062      | -0.63% |
|                                        |                 | 20       | all      | 1477       | -28.8% | 2098      | +1.1%  |
|                                        |                 | 10       | all      | 1466       | -29.3% | 2062      | -0.63% |
|                                        |                 | 8        | all      | 1470       | -29.2% | 2055      | -0.96% |
|                                        |                 | 5        | all      | 1456       | -29.8% | 2060      | -0.72% |
|                                        |                 | 2        | all      | 1452       | -30.0% | 2053      | -1.1%  |

Table S2: Total number of SCF iterations for Phenol(H<sub>2</sub>O)<sub>10</sub> and (H<sub>2</sub>O)<sub>20</sub> at PBE/def2-SVP and B3LYP/def2-TZVPPD levels using standard geometry optimization (OPT) and G-Ext-DIIS-augmented OPT with the overlap matrix descriptor **S**, core Hamiltonian matrix **H** and Coulomb matrix **CM**. Results are reported for different combinations of the length of the initial standard optimization phase ( $i = 25, 20, 10, 8, 5,$  and  $2$ ) required for data accumulation and the number of historical density matrices ( $k = \text{all}$ ) used in the extrapolation. The corresponding percentage reduction (PR) in SCF iterations, relative to the standard OPT procedure in which the MO coefficients from the preceding step are used as the initial guess for the current SCF calculation, is also reported.

| System                                 | Standard | $i$ | $k$ | G-Ext-DIIS |        |          |        |           |        |
|----------------------------------------|----------|-----|-----|------------|--------|----------|--------|-----------|--------|
|                                        |          |     |     | <b>S</b>   | PR (%) | <b>H</b> | PR (%) | <b>CM</b> | PR (%) |
| PBE/def2-SVP                           |          |     |     |            |        |          |        |           |        |
| Phenol(H <sub>2</sub> O) <sub>10</sub> | 3909     | 25  | all | 2975       | -23.9% | 3009     | -23.0% | 4025      | +3.0%  |
|                                        |          | 20  | all | 2963       | -24.2% | 3001     | -23.2% | 4099      | +4.9%  |
|                                        |          | 10  | all | 2962       | -24.2% | 2997     | -23.3% | 4055      | +3.7%  |
|                                        |          | 8   | all | 2958       | -24.3% | 2989     | -23.5% | 4070      | +4.1%  |
|                                        |          | 5   | all | 2955       | -24.2% | 2986     | -23.6% | 4050      | +3.6%  |
|                                        |          | 2   | all | 2938       | -24.8% | 2981     | -23.7% | 4094      | +4.7%  |
| (H <sub>2</sub> O) <sub>20</sub>       | 2068     | 25  | all | 1524       | -26.3% | 1541     | -25.5% | 2100      | +1.5%  |
|                                        |          | 20  | all | 1511       | -26.9% | 1530     | -26.0% | 2103      | +1.7%  |
|                                        |          | 10  | all | 1501       | -27.4% | 1515     | -26.7% | 2107      | +1.9%  |
|                                        |          | 8   | all | 1499       | -27.5% | 1513     | -26.8% | 2110      | +2.0%  |
|                                        |          | 5   | all | 1492       | -27.9% | 1506     | -27.2% | 2111      | +2.1%  |
|                                        |          | 2   | all | 1487       | -28.1% | 1501     | -27.4% | 2111      | +2.1%  |
| B3LYP/def2-TZVPPD                      |          |     |     |            |        |          |        |           |        |
| Phenol(H <sub>2</sub> O) <sub>10</sub> | 3018     | 25  | all | 2339       | -22.5% | 2325     | -23.0% | 3404      | +12.8% |
|                                        |          | 20  | all | 2335       | -22.6% | 2323     | -23.0% | 3449      | +14.3% |
|                                        |          | 10  | all | 2324       | -23.0% | 2297     | -23.9% | 3454      | +14.4% |
|                                        |          | 8   | all | 2320       | -23.1% | 2292     | -24.1% | 3421      | +13.4% |
|                                        |          | 5   | all | 2313       | -23.4% | 2291     | -24.1% | 3392      | +12.4% |
|                                        |          | 2   | all | 2282       | -24.2% | 2271     | -24.8% | 3488      | +15.6% |
| (H <sub>2</sub> O) <sub>20</sub>       | 2695     | 25  | all | 2038       | -24.2% | 2162     | -19.8% | 3052      | +13.2% |
|                                        |          | 20  | all | 2036       | -24.5% | 2153     | -20.1% | 2810      | +4.3%  |
|                                        |          | 10  | all | 2026       | -24.8% | 2054     | -23.8% | 3204      | +18.9% |
|                                        |          | 8   | all | 1949       | -27.7% | 1939     | -28.1% | 3044      | +13.0% |
|                                        |          | 5   | all | 1945       | -27.8% | 1936     | -28.2% | 3250      | +20.6% |
|                                        |          | 2   | all | 1937       | -28.1% | 1932     | -28.3% | 3287      | +22.0% |



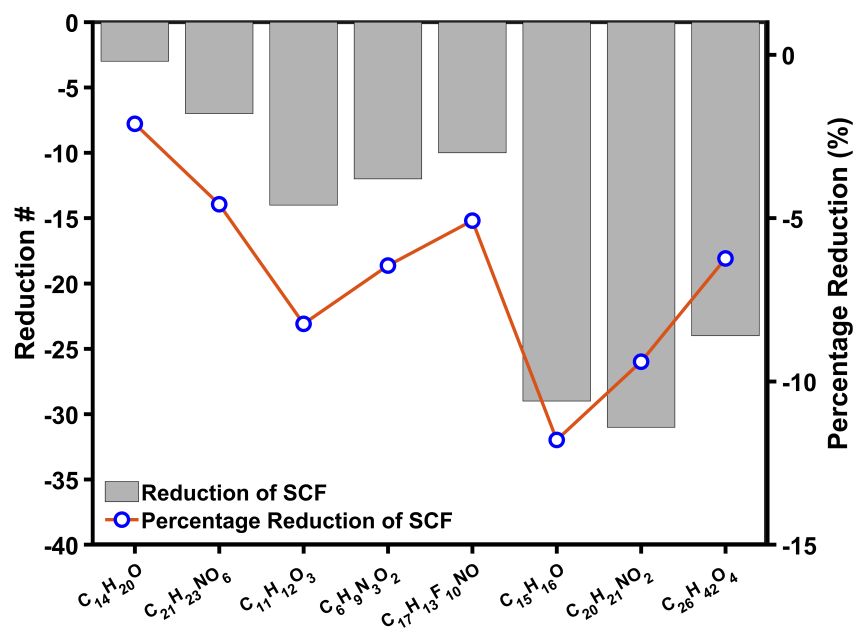

(a) Covalently Bonded Organic Molecules

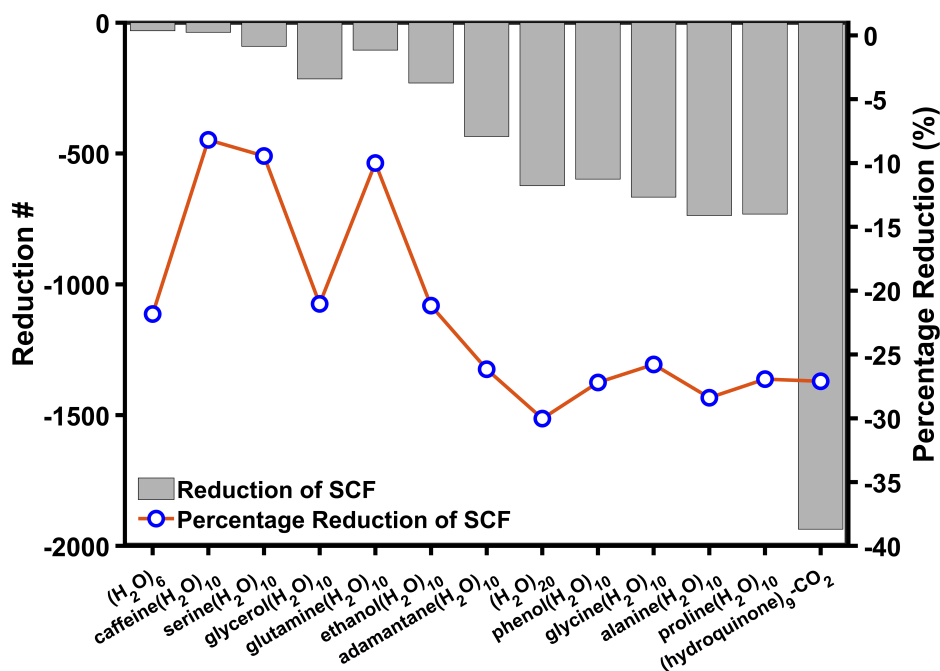

(b) Noncovalently Bonded Clusters

Figure S2: Reduction and percentage reduction (%) in total SCF iterations between standard and G-Ext-DIIS-accelerated geometry optimization calculations using the core Hamiltonian matrix  $\mathbf{H}$  as the descriptor with the (2, all) setting at the B3LYP/def2-SVP level for (a) eight covalently bonded organic molecules and (b) 13 noncovalently bonded clusters. The systems are arranged from left to right according to the increasing total numbers of SCF iterations in the standard geometry optimization calculations, as reported in Table S3.

Table S3: Total number of SCF iterations for benchmark molecular systems at the B3LYP/def2-SVP level using standard geometry optimization (OPT) and G-Ext-DIIS-augmented OPT with the overlap matrix descriptor **S**, core Hamiltonian matrix **H** and Coulomb matrix **CM**. Results are reported for a combinations of the length of the initial standard optimization phase ( $i = 2$ ) required for data accumulation and the number of historical density matrices ( $k = \text{all}$ ) used in the extrapolation. The corresponding percentage reduction (PR) in SCF iterations relative to the standard OPT procedure using molecular orbital (MO) coefficients from the preceding optimization step as the initial guess is also reported.

| System                                                      | Standard | <i>i</i> | <i>k</i> | G-Ext-DIIS |         |          |         |           |         |
|-------------------------------------------------------------|----------|----------|----------|------------|---------|----------|---------|-----------|---------|
|                                                             | OPT      |          |          | <b>S</b>   | PR (%)  | <b>H</b> | PR (%)  | <b>CM</b> | PR (%)  |
| Covalently Bonded Organic Molecules                         |          |          |          |            |         |          |         |           |         |
| C <sub>14</sub> H <sub>20</sub> O                           | 142      | 2        | all      | 139        | -2.11%  | 139      | -2.11%  | 155       | +9.15%  |
| C <sub>21</sub> H <sub>23</sub> NO <sub>6</sub>             | 153      | 2        | all      | 146        | -4.58%  | 146      | -4.58%  | 159       | +3.92%  |
| C <sub>11</sub> H <sub>12</sub> O <sub>3</sub>              | 170      | 2        | all      | 156        | -8.24%  | 156      | -8.24%  | 173       | +1.76%  |
| C <sub>6</sub> H <sub>9</sub> N <sub>3</sub> O <sub>2</sub> | 186      | 2        | all      | 175        | -5.91%  | 174      | -6.45%  | 190       | +2.15%  |
| C <sub>17</sub> H <sub>13</sub> F <sub>10</sub> NO          | 197      | 2        | all      | 188        | -4.57%  | 187      | -5.08%  | 208       | +5.58%  |
| C <sub>15</sub> H <sub>16</sub> O                           | 246      | 2        | all      | 217        | -11.79% | 217      | -11.79% | 256       | +4.07%  |
| C <sub>20</sub> H <sub>21</sub> NO <sub>2</sub>             | 330      | 2        | all      | 298        | -9.70%  | 299      | -9.39%  | 372       | +12.73% |
| C <sub>26</sub> H <sub>42</sub> O <sub>4</sub>              | 385      | 2        | all      | 362        | -5.97%  | 361      | -6.23%  | 414       | +7.53%  |
| Noncovalently Bonded Clusters                               |          |          |          |            |         |          |         |           |         |
| (H <sub>2</sub> O) <sub>6</sub>                             | 142      | 2        | all      | 111        | -21.83% | 111      | -21.83% | 134       | -5.63%  |
| Caffeine(H <sub>2</sub> O) <sub>10</sub>                    | 452      | 2        | all      | 412        | -8.85%  | 415      | -8.19%  | 472       | +4.42%  |
| Serine(H <sub>2</sub> O) <sub>10</sub>                      | 963      | 2        | all      | 871        | -9.55%  | 872      | -9.45%  | 998       | +3.63%  |
| Glycerol(H <sub>2</sub> O) <sub>10</sub>                    | 1022     | 2        | all      | 803        | -21.43% | 807      | -21.04% | 1070      | +4.70%  |
| Glutamine(H <sub>2</sub> O) <sub>10</sub>                   | 1050     | 2        | all      | 946        | -9.90%  | 945      | -10.00% | 1068      | +1.71%  |
| Ethanol(H <sub>2</sub> O) <sub>10</sub>                     | 1091     | 2        | all      | 864        | -20.81% | 860      | -21.17% | 1197      | +9.72%  |
| Adamantane(H <sub>2</sub> O) <sub>10</sub>                  | 1663     | 2        | all      | 1224       | -26.40% | 1228     | -26.16% | 1679      | +0.96%  |
| (H <sub>2</sub> O) <sub>20</sub>                            | 2075     | 2        | all      | 1437       | -24.50% | 1452     | -30.02% | 2053      | -1.06%  |
| Phenol(H <sub>2</sub> O) <sub>10</sub>                      | 2199     | 2        | all      | 1605       | -27.01% | 1601     | -27.20% | 2204      | +0.23%  |
| Glycine(H <sub>2</sub> O) <sub>10</sub>                     | 2587     | 2        | all      | 1912       | -26.10% | 1920     | -25.78% | 2544      | -1.66%  |
| Alanine(H <sub>2</sub> O) <sub>10</sub>                     | 2596     | 2        | all      | 1835       | -29.31% | 1859     | -28.39% | 2637      | +1.58%  |
| Proline(H <sub>2</sub> O) <sub>10</sub>                     | 2718     | 2        | all      | 1987       | -26.89% | 1986     | -26.93% | 2707      | -0.40%  |
| (Hydroquinone) <sub>9</sub> CO <sub>2</sub>                 | 7144     | 2        | all      | 5213       | -27.03% | 5208     | -27.10% | 7318      | +2.44%  |

Table S4: Total number of SCF iterations for benchmark molecular systems at the B3LYP/def2-SVP level using standard geometry optimization (OPT) and G-Ext-DIIS-augmented OPT with the overlap matrix descriptor **S**, core Hamiltonian matrix **H** and Coulomb matrix **CM**. Results are reported for a combinations of the length of the initial standard optimization phase ( $i = 2$ ) required for data accumulation and the number of historical density matrices ( $k = \text{all}$ ) used in the extrapolation. The corresponding percentage reduction (PR) in SCF iterations, relative to the standard OPT procedure in which the superposition of atomic densities (SAD) method is used to generate the initial guess for each SCF calculation, is also reported.

| System                                                      | Standard OPT |      |         | $i$ | $k$ | G-Ext-DIIS |         |          |         |           |         |
|-------------------------------------------------------------|--------------|------|---------|-----|-----|------------|---------|----------|---------|-----------|---------|
|                                                             | SAD          | MO   | PR (%)  |     |     | <b>S</b>   | PR (%)  | <b>H</b> | PR (%)  | <b>CM</b> | PR (%)  |
| Covalently Bonded Organic Molecules                         |              |      |         |     |     |            |         |          |         |           |         |
| C <sub>14</sub> H <sub>20</sub> O                           | 182          | 142  | -21.98% | 2   | all | 139        | -23.63% | 139      | -23.63% | 155       | -14.84% |
| C <sub>21</sub> H <sub>23</sub> NO <sub>6</sub>             | 210          | 153  | -27.14% | 2   | all | 146        | -30.48% | 146      | -30.48% | 159       | -24.29% |
| C <sub>11</sub> H <sub>12</sub> O <sub>3</sub>              | 210          | 170  | -19.05% | 2   | all | 156        | -25.71% | 156      | -25.71% | 173       | -17.62% |
| C <sub>6</sub> H <sub>9</sub> N <sub>3</sub> O <sub>2</sub> | 225          | 186  | -17.33% | 2   | all | 175        | -22.22% | 174      | -22.67% | 190       | -15.56% |
| C <sub>17</sub> H <sub>13</sub> F <sub>10</sub> NO          | 252          | 197  | -21.83% | 2   | all | 188        | -25.40% | 187      | -25.79% | 208       | -17.46% |
| C <sub>15</sub> H <sub>16</sub> O                           | 308          | 246  | -20.13% | 2   | all | 217        | -29.55% | 217      | -29.55% | 256       | -16.88% |
| C <sub>20</sub> H <sub>21</sub> NO <sub>2</sub>             | 459          | 330  | -28.10% | 2   | all | 298        | -35.08% | 299      | -34.86% | 372       | -18.95% |
| C <sub>26</sub> H <sub>42</sub> O <sub>4</sub>              | 474          | 385  | -18.78% | 2   | all | 362        | -23.63% | 361      | -23.84% | 414       | -12.66% |
| Noncovalently Bonded Clusters                               |              |      |         |     |     |            |         |          |         |           |         |
| (H <sub>2</sub> O) <sub>6</sub>                             | 160          | 142  | -11.25% | 2   | all | 111        | -30.63% | 111      | -30.63% | 134       | -16.25% |
| Caffeine(H <sub>2</sub> O) <sub>10</sub>                    | 630          | 452  | -28.25% | 2   | all | 412        | -34.60% | 415      | -34.13% | 472       | -25.08% |
| Serine(H <sub>2</sub> O) <sub>10</sub>                      | 1274         | 963  | -24.41% | 2   | all | 871        | -31.63% | 872      | -31.55% | 998       | -21.66% |
| Glycerol(H <sub>2</sub> O) <sub>10</sub>                    | 1417         | 1022 | -27.88% | 2   | all | 803        | -43.33% | 807      | -43.05% | 1070      | -24.49% |
| Glutamine(H <sub>2</sub> O) <sub>10</sub>                   | 1358         | 1050 | -22.68% | 2   | all | 946        | -30.34% | 945      | -30.41% | 1068      | -21.35% |
| Ethanol(H <sub>2</sub> O) <sub>10</sub>                     | 1677         | 1091 | -34.94% | 2   | all | 864        | -48.48% | 860      | -48.72% | 1197      | -28.62% |
| Adamantane(H <sub>2</sub> O) <sub>10</sub>                  | 2366         | 1663 | -29.71% | 2   | all | 1224       | -48.27% | 1228     | -48.10% | 1679      | -29.04% |
| (H <sub>2</sub> O) <sub>20</sub>                            | 2990         | 2075 | -30.60% | 2   | all | 1437       | -51.94% | 1452     | -51.44% | 2053      | -31.34% |
| Phenol(H <sub>2</sub> O) <sub>10</sub>                      | 3150         | 2199 | -30.19% | 2   | all | 1605       | -49.05% | 1601     | -49.17% | 2204      | -30.03% |
| Glycine(H <sub>2</sub> O) <sub>10</sub>                     | 3640         | 2587 | -28.93% | 2   | all | 1912       | -47.47% | 1920     | -47.25% | 2544      | -30.11% |
| Alanine(H <sub>2</sub> O) <sub>10</sub>                     | 3850         | 2596 | -32.57% | 2   | all | 1835       | -52.34% | 1859     | -51.71% | 2637      | -31.51% |
| Proline(H <sub>2</sub> O) <sub>10</sub>                     | 3990         | 2718 | -31.88% | 2   | all | 1987       | -50.20% | 1986     | -50.23% | 2707      | -32.16% |
| (Hydroquinone) <sub>9</sub> CO <sub>2</sub>                 | 10598        | 7144 | -32.59% | 2   | all | 5213       | -50.81% | 5208     | -50.86% | 7318      | -30.95% |
